# Supplementary material for: Construction of Dual-Shell Mo2C/C Microsphere towards Efficient Electromagnetic Wave Absorption
Source: MDPI journal article supplement (doi:10.3390/ijms232314502), 2022-11-22
Supplement: s1 [file s1]

## Supporting Information

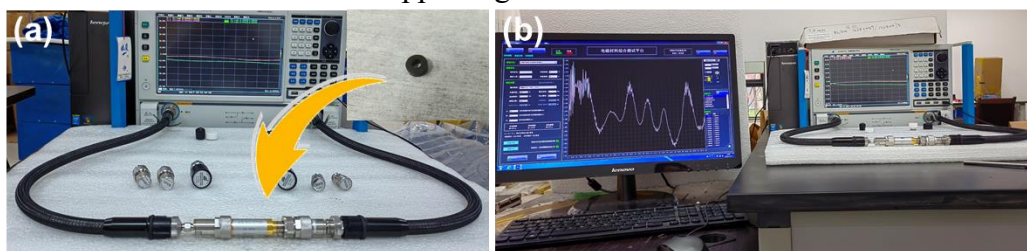

**Figure S1.** The pictures of coaxial calibration kit and sample (a), and measurement procee of Ceyear AV3672C (b).

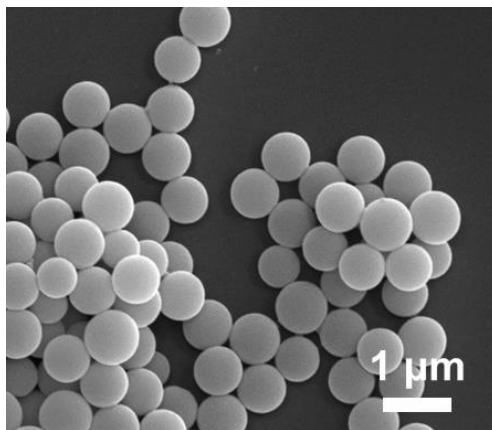

**Figure S2.** SEM image of Mo-GL nanospheres.

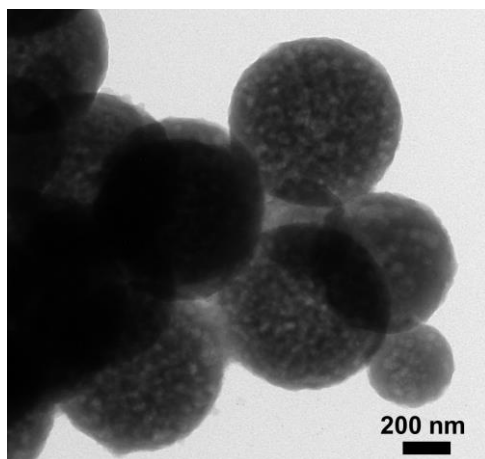

**Figure S3.** TEM image of Mo-PD nanospheres.

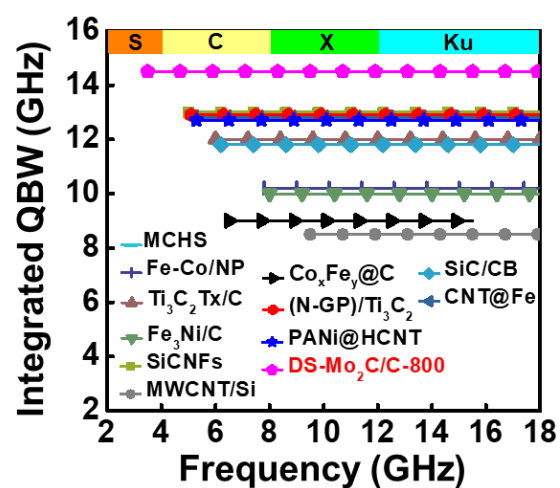

**Figure S4.** The integrated QBW at the range of 2.0-18.0 GHz of DS- $\text{Mo}_2\text{C/C-800}$  and other carbon-based EM absorption materials.

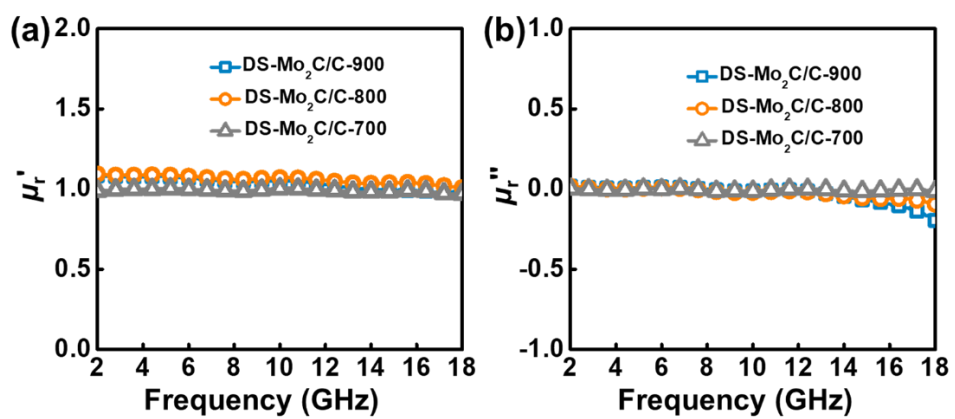

**Figure S5.** Real parts (a) and imaginary parts (b) of the complex permeability of DS-Mo<sub>2</sub>C/C-700, DS-Mo<sub>2</sub>C/C-800, and DS-Mo<sub>2</sub>C/C-900.

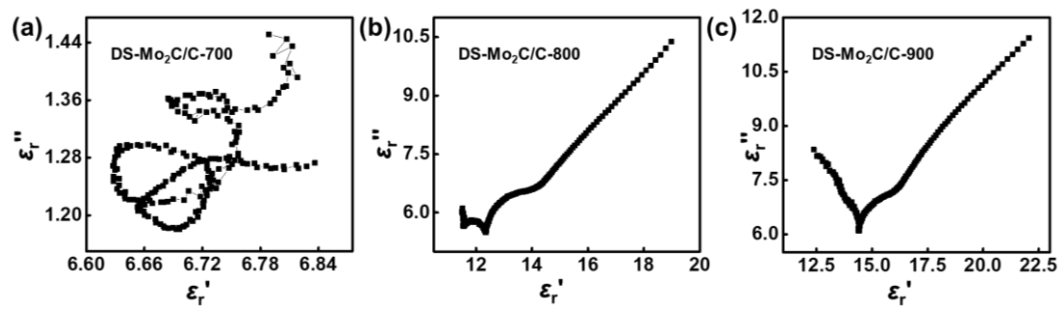

**Figure S6.** The Cole-Cole semicircle of DS-Mo<sub>2</sub>C/C-700 (a), DS-Mo<sub>2</sub>C/C-800 (b), and DS-Mo<sub>2</sub>C/C-900 (c).
